# Supplementary material
Source: Springer Nature journal article supplement (https://www.springermedizin.de/resource/supplementary/13063_2012_1116_MOESM2_ESM.pdf/9619320)

**Infrastructure  
Scale**

High

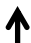

Low

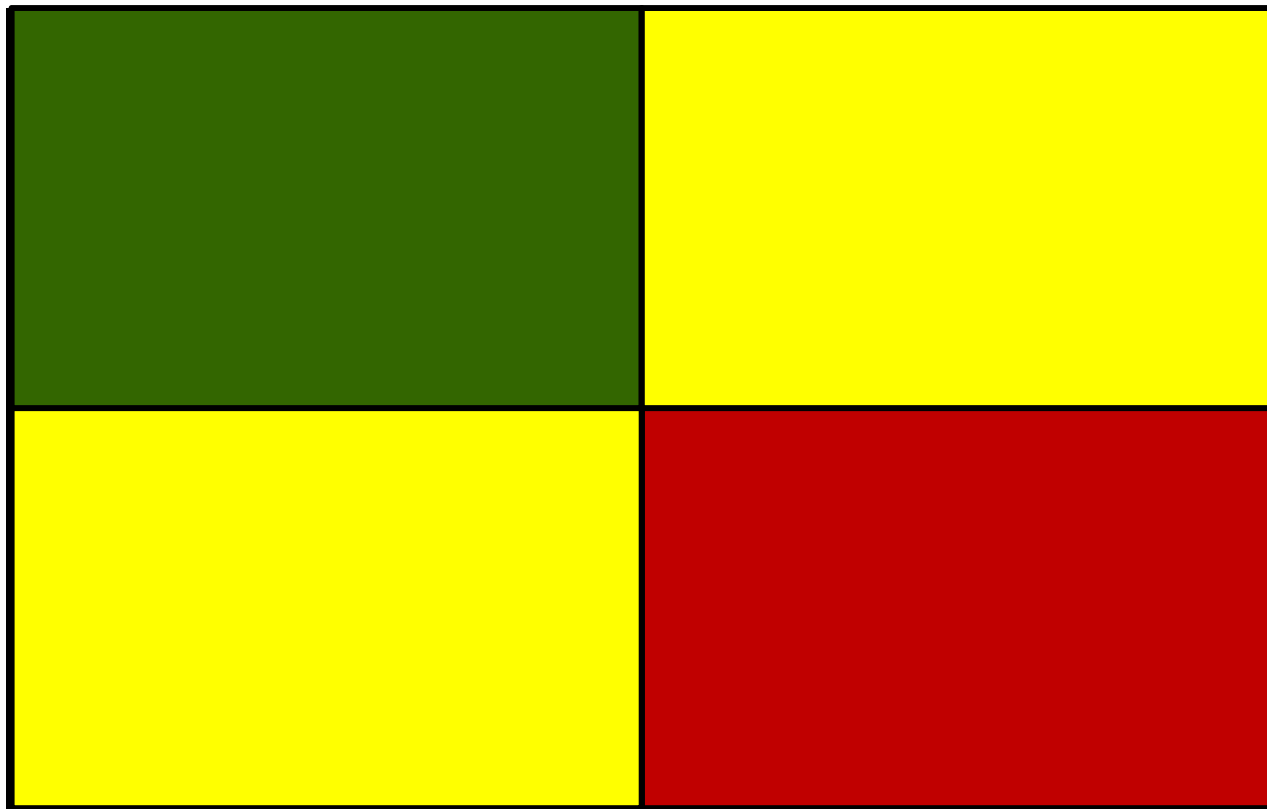

Low

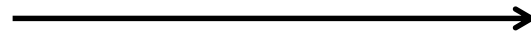

High

**Adaptivity Scale**

Supplement: MOESM2 [file 9619320]
